# Supplementary material
Source: Research Square preprint supplement (doi:10.21203/rs.3.rs-9847455/v1)
Supplement: Supplementary file 1 [file acc3a931bc112e69fe01e86c.docx]

**Network-based analyses identify GFAP as a cross-domain hub linking synaptic, neuronal, and inflammatory markers in Alzheimer’s disease**

Chiara Trasciatti1-4 § and Andrea Pilotto1-5 §*, Chiara Tolassi1-3, Flavio Ragni6, Elena Marcello7, Monica Moroni6, Stefano Bovo6, Caterina Martinuzzo1, Silvia Pelucchi7, Salvatore Caratozzolo2, Irene Girotto1-3, Laura D’Andrea7, Ramona Stringhi7, Andrea L. Benedet8, Ilaria Pola8, Henrik Zetterberg8-14, Nicholas J. Ashton8,15-16, Giuseppe Jurman6,17, Monica di Luca7 # and Alessandro Padovani1-4, 18 #

1 Department of continuity of care and frailty, Neurology Unit, ASST Spedali Civili of Brescia, Brescia, Italy

2 Neurobiorepository and Laboratory of advanced biological markers, University of Brescia and ASST Spedali Civili Hospital, Brescia, Italy

3 Laboratory of digital Neurology and biosensors, University of Brescia, Italy

4 Neurology Unit, Department of Clinical and Experimental Sciences, University of Brescia, Italy

5 Center for Alzheimer Research, Division of Clinical Geriatrics, Department of Neurobiology, Care Sciences and Society (NVS), Karolinska Institute, Sweden

6 Data Science for Health, Fondazione Bruno Kessler, Trento, Italy

7 Department of Pharmacological and Biomolecular Sciences, “Rodolfo Paoletti”, University of Milan, Milan, Italy

8 Department of Psychiatry and Neurochemistry, Institute of Neuroscience & Physiology, the Sahlgrenska Academy at the University of Gothenburg, Mölndal, Sweden

9 Clinical Neurochemistry Laboratory, Sahlgrenska University Hospital, Mölndal, Sweden

10 Department of Pathology and Laboratory Medicine, University of Wisconsin School of Medicine and Public Health, Madison, WI, USA

11 Wisconsin Alzheimer’s Disease Research Center, University of Wisconsin School of Medicine and Public Health, University of Wisconsin-Madison, Madison, WI, USA

12 Department of Neurodegenerative Disease, UCL Institute of Neurology, Queen Square, London, UK

13 UK Dementia Research Institute at UCL, London, UK

14 Centre for Brain Research, Indian Institute of Science, Bangalore, India

15 Banner Alzheimer's Institute and University of Arizona, Phoenix, AZ, USA

16 Banner Sun Health Research Institute, Sun City, AZ 85351, USA

17 Department of Biomedical Sciences, Humanitas University, Milan, Italy

18 Brain Health Center, University of Brescia, Brescia, Italy

**Supplementary Figure 1.** *Comparison of pairwise Spearman correlations between biomarkers in the AD and HC cohorts after adjustment for age and sex. The heatmap displays Z-scores representing the difference between group-specific correlation coefficients. Only statistically significant differences (p < 0.05, two-tailed) are shown. Positive values indicate stronger correlations in the AD group relative to HC (blue), and negative values indicate stronger correlations in HC (red).*


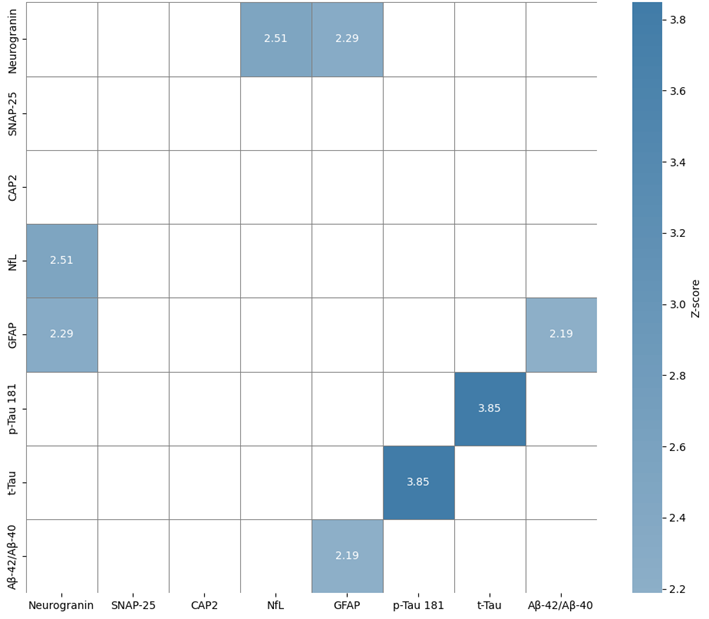


Abbreviations: neurogranin; SNAP-25, synaptosomal-associated protein 25 kDa; CAP2, cyclase-associated protein 2; NfL, neurofilament light chain; GFAP, glial fibrillary acidic protein; p-Tau 181, phosphorylated tau (Thr181); t-Tau, total tau; Aβ-40, amyloid-β 1–40; Aβ-42, amyloid-β 1–42.
